# Supplementary material
Source: publisher figshare collection journal article supplement (https://asha.figshare.com/articles/dataset/_/16528524)
Supplement: Supplementary file 1 [file 1]

Supplemental Material S1. Checklist for web-based survey design and reporting (Eysenbach, 2004)<sup>a</sup>

| Item category                                                                        | Checklist item                           | Y/ N | Comments                                                                                                                                     |
|--------------------------------------------------------------------------------------|------------------------------------------|------|----------------------------------------------------------------------------------------------------------------------------------------------|
| Design                                                                               | Describe survey design                   | Y    | Target population as described in ethics research protocol. Purposeful sampling.                                                             |
| Institutional Review Board (IRB) approval and informed consent process               | IRB approval                             | Y    | From The University of Queensland Human Research Ethics Committee. Study adheres to National Statement on Ethical Conduct in Human Research. |
|                                                                                      | Informed consent                         | Y    | Participant Information Sheet and Participant Consent Form will be on the first page of the survey.                                          |
|                                                                                      | Data protection                          | Y    | Only the research team has access to password-protected data on SurveyMonkey.                                                                |
| Development and pre-testing                                                          | Development and testing                  | Y    | Survey will be piloted at The University of Queensland with a small group of aphasia researchers.                                            |
| Recruitment process and description of the sample having access to the questionnaire | Open survey vs closed survey             | Y    | Open and closed survey.                                                                                                                      |
|                                                                                      | Contact mode                             | Y    | Initial contact with potential participants will be made via email.                                                                          |
|                                                                                      | Advertising the survey                   | Y    |                                                                                                                                              |
| Survey administration                                                                | Web/E-mail                               | Y    | Web                                                                                                                                          |
|                                                                                      | Context                                  | Y    | International aphasia researchers.                                                                                                           |
|                                                                                      | Mandatory/voluntary                      | Y    | Voluntary.                                                                                                                                   |
|                                                                                      | Incentives                               | Y    | Nil financial incentives offered. Summary of research results will be offered to participants if name and email address are provided.        |
|                                                                                      | Time/Date                                | Y    | April 2019 – June 2019                                                                                                                       |
|                                                                                      | Randomisation of items or questionnaires | Y    | To prevent order bias, items in the section on barriers and facilitators will be randomised for each participant.                            |
|                                                                                      | Number of items                          | Y    | 52 items                                                                                                                                     |
|                                                                                      | Number of screens (pages)                | Y    | 11 pages                                                                                                                                     |
|                                                                                      | Completeness check                       | Y    | Forced-response feature selected on SurveyMonkey.                                                                                            |

|                                                       |                                                                                                            |     |                                                                                                                                                                                                                                                                 |
|-------------------------------------------------------|------------------------------------------------------------------------------------------------------------|-----|-----------------------------------------------------------------------------------------------------------------------------------------------------------------------------------------------------------------------------------------------------------------|
|                                                       | Review step                                                                                                | N   | Respondents will not be allowed to review and change their answers as respondents will be asked to answer questions prior to being given information/definitions in subsequent parts of the survey.                                                             |
| Response rate                                         | Unique site visitor                                                                                        | N   | Collection of IP addresses and cookies will be disabled to protect anonymity of respondents.                                                                                                                                                                    |
|                                                       | View rate (Ratio of unique survey visitors/ unique site visitors)                                          | N   |                                                                                                                                                                                                                                                                 |
|                                                       | Participation rate (Ratio of unique visitors who agreed to participate/ unique first survey page visitors) | N   |                                                                                                                                                                                                                                                                 |
|                                                       | Completion rate (Ratio of users who finished the survey/users who agreed to participate)                   | TBC |                                                                                                                                                                                                                                                                 |
| Preventing multiple entries from the same individuals | Cookies used                                                                                               | N   | Cookies will not be used to assign unique user identifiers as some respondents may leave and wish to start the survey again. Responses provided in the demographics section will be screened to identify and avoid duplicate entries from the same respondents. |
|                                                       | IP check                                                                                                   | N   | IP addresses will not be recorded to protect respondent anonymity.                                                                                                                                                                                              |
|                                                       | Log file analysis                                                                                          | N   |                                                                                                                                                                                                                                                                 |
|                                                       | Registration                                                                                               | N   | Open survey will be used.                                                                                                                                                                                                                                       |
| Analysis                                              | Handling of incomplete questionnaires                                                                      | Y   | Completed surveys and surveys terminated after the demographics section will be included in final analysis. Only surveys that are terminated prior to completing the demographics section will be excluded.                                                     |
|                                                       | Questionnaires submitted with an atypical timestamp                                                        | N   |                                                                                                                                                                                                                                                                 |
|                                                       | Statistical correction                                                                                     | TBC | None as a representative sample will be collected.                                                                                                                                                                                                              |

<sup>a</sup>Eysenbach, G. (2004). Improving the quality of web surveys: The Checklist for Reporting Results of Internet E-Surveys (CHERRIES). *Journal of Medical Internet Research*, 6(3), e34. <https://doi.org/10.2196/jmir.6.3.e34>
