# Supplementary material
Source: publisher figshare collection journal article supplement (https://asha.figshare.com/articles/dataset/_/16528524)
Supplement: Supplementary file 2 [file 1]

|                                                        |                                                                                                                                     |                                                                      |                                                                                                                                                                                                                                   |                                                                                                                    |
|--------------------------------------------------------|-------------------------------------------------------------------------------------------------------------------------------------|----------------------------------------------------------------------|-----------------------------------------------------------------------------------------------------------------------------------------------------------------------------------------------------------------------------------|--------------------------------------------------------------------------------------------------------------------|
| <p><b>Memory, attention and decision processes</b></p> | <p>Lack of automaticity.</p> <p>Participants had reasons for not implementing the ROMA COS in their aphasia treatment research.</p> | <p>Training</p> <p>Environmental restructuring</p> <p>Enablement</p> | <p>Online or face to face individual/group training sessions (video, webinar).</p> <p>Additional resource support (e.g. time/funding to access professional development, training and/or workshops).</p>                          | <p>Yes.</p> <p>Yes, some aspects (resources).</p> <p>Yes, behavioural support.</p>                                 |
| <p><b>Behavioural regulation</b></p>                   | <p>Lack of planning and monitoring of ROMA COS use and implementation.</p>                                                          | <p>Education</p> <p>Training</p> <p>Modelling</p> <p>Enablement</p>  | <p>Provision of online training and/or a checklist. This may allow researchers to plan for and self-monitor ROMA COS use.</p> <p>Could also implement international reporting checklist in combination with auditing process.</p> | <p>Yes, some aspects (resources).</p> <p>May not be feasible/acceptable.</p> <p>Resources required to monitor.</p> |
